# Supplementary material for: Glucose Transporter-2 Regulation of Male versus Female Hypothalamic Astrocyte MAPK Expression and Activation: Impact of Glucose
Source: MDPI journal article supplement (doi:10.3390/neuroglia4030011), 2023-06-21
Supplement: s1 [file s1]

**Supplementary Table 1. Statistical Analysis of Sex, siRNA, and Glucoprivation (GP) Main Effects and Interactions for Data Presented in Figures 1-5.**

|          | F statistic                      | Main Effects                     |                                 |                                  | Interactions                    |                                 |                                 |                                 |
|----------|----------------------------------|----------------------------------|---------------------------------|----------------------------------|---------------------------------|---------------------------------|---------------------------------|---------------------------------|
|          |                                  | Sex                              | siRNA                           | GP                               | Sex/siRNA                       | Sex/GP                          | siRNA/GP                        | Sex/siRNA/GP                    |
| Figure 1 |                                  |                                  |                                 |                                  |                                 |                                 |                                 |                                 |
| 1A       | $F_{(7,16)}=11.96$<br>$p<0.001$  | $F_{(1,16)}=12.19$<br>$p=0.003$  | $F_{(1,16)}=0.13$<br>$p=0.719$  | $F_{(1,16)}=29.23$<br>$p<0.001$  | $F_{(1,16)}=29.42$<br>$p<0.001$ | $F_{(1,16)}=2.30$<br>$p=0.149$  | $F_{(1,160)}=1.09$<br>$p=0.313$ | $F_{(1,16)}=9.32$<br>$p=0.008$  |
| 1B       | $F_{(7,16)}=9.44$<br>$p<0.001$   | $F_{(1,16)}=18.67$<br>$p=0.001$  | $F_{(1,16)}=13.86$<br>$p=0.002$ | $F_{(1,16)}=20.93$<br>$p<0.001$  | $F_{(1,16)}=3.72$<br>$p=0.072$  | $F_{(1,16)}=4.93$<br>$p=0.041$  | $F_{(1,16)}=0.43$<br>$p=0.519$  | $F_{(1,16)}=3.56$<br>$p=0.077$  |
| 1C       | $F_{(7,16)}=17.93$<br>$p<0.001$  | $F_{(1,16)}=8.18$<br>$p=0.011$   | $F_{(1,16)}=0.28$<br>$p=0.870$  | $F_{(1,16)}=54.54$<br>$p<0.001$  | $F_{(1,16)}=43.74$<br>$p<0.001$ | $F_{(1,16)}=5.63$<br>$p=0.031$  | $F_{(1,16)}=0.81$<br>$p=0.381$  | $F_{(1,16)}=12.55$<br>$p=0.003$ |
| 1D       | $F_{(7,16)}=5.79$<br>$P=0.002$   | $F_{(1,16)}=2.83$<br>$p=0.112$   | $F_{(1,16)}=10.94$<br>$p=0.005$ | $F_{(1,16)}=18.09$<br>$p=0.001$  | $F_{(1,16)}=0.01$<br>$p=0.922$  | $F_{(1,16)}=3.71$<br>$p=0.072$  | $F_{(1,16)}=1.49$<br>$p=0.240$  | $F_{(1,16)}=3.48$<br>$p=0.081$  |
| Figure 2 |                                  |                                  |                                 |                                  |                                 |                                 |                                 |                                 |
| 2A       | $F_{(7,16)}=55.94$<br>$p<0.001$  | $F_{(1,16)}=139.05$<br>$p<0.001$ | $F_{(1,16)}=34.54$<br>$p<0.001$ | $F_{(1,16)}=122.13$<br>$p<0.001$ | $F_{(1,16)}=77.64$<br>$p<0.001$ | $F_{(1,16)}=15.05$<br>$p=0.001$ | $F_{(1,16)}=0.77$<br>$p=0.393$  | $F_{(1,16)}=2.42$<br>$p=0.139$  |
| 2B       | $F_{(7,16)}=56.521$<br>$p<0.001$ | $F_{(1,16)}=85.021$<br>$p<0.001$ | $F_{(1,16)}=23.43$<br>$p<0.001$ | $F_{(1,16)}=186330$<br>$p<0.001$ | $F_{(1,16)}=60.89$<br>$p<0.001$ | $F_{(1,16)}=33.68$<br>$p<0.001$ | $F_{(1,16)}=3.95$<br>$p=0.064$  | $F_{(1,16)}=0.01$<br>$p=0.971$  |
| Figure 3 |                                  |                                  |                                 |                                  |                                 |                                 |                                 |                                 |
| 3A       | $F_{(7,160)}=14.65$<br>$p<0.001$ | $F_{(1,16)}=3.81$<br>$p=0.069$   | $F_{(1,16)}=5.49$<br>$p=0.032$  | $F_{(1,16)}=79.23$<br>$p<0.001$  | $F_{(1,16)}=2.55$<br>$p=0.130$  | $F_{(1,16)}=3.79$<br>$p=0.069$  | $F_{(1,16)}=3.28$<br>$p=0.089$  | $F_{(1,16)}=4.40$<br>$p=0.052$  |
| 3B       | $F_{(7,16)}=30.37$<br>$p<0.001$  | $F_{(1,16)}=0.76$<br>$p=0.396$   | $F_{(1,16)}=26.83$<br>$p<0.001$ | $F_{(1,16)}=41.89$<br>$p<0.001$  | $F_{(1,16)}=108.9$<br>$p<0.001$ | $F_{(1,16)}=0.86$<br>$p=0.369$  | $F_{(1,16)}=13.86$<br>$p=0.002$ | $F_{(1,16)}=19.44$<br>$p=0.001$ |

|    |                                 |                                |                                 |                                 |                                 |                                |                                 |                                 |
|----|---------------------------------|--------------------------------|---------------------------------|---------------------------------|---------------------------------|--------------------------------|---------------------------------|---------------------------------|
| 3C | $F_{(7,16)}=21.96$<br>$p<0.001$ | $F_{(1,16)}=3.36$<br>$p=0.086$ | $F_{(1,16)}=14.48$<br>$p=0.002$ | $F_{(1,16)}=24.49$<br>$p<0.001$ | $F_{(1,16)}=59.21$<br>$p<0.001$ | $F_{(1,16)}=1.80$<br>$p=0.198$ | $F_{(1,16)}=38.74$<br>$p<0.001$ | $F_{(1,16)}=11.59$<br>$p=0.004$ |
|----|---------------------------------|--------------------------------|---------------------------------|---------------------------------|---------------------------------|--------------------------------|---------------------------------|---------------------------------|

---

#### Figure 4

|    |                                 |                                  |                                  |                                 |                                 |                                  |                                 |                                 |
|----|---------------------------------|----------------------------------|----------------------------------|---------------------------------|---------------------------------|----------------------------------|---------------------------------|---------------------------------|
| 4A | $F_{(7,16)}=5.57$<br>$p=0.002$  | $F_{(1,16)}=6.10$<br>$p=0.025$   | $F_{(1,16)}=0.22$<br>$p=0.650$   | $F_{(1,16)}=0.55$<br>$p=0.468$  | $F_{(1,16)}=10.82$<br>$p=0.005$ | $F_{(1,16)}=9.05$<br>$p=0.008$   | $F_{(1,16)}=4.11$<br>$p=0.060$  | $F_{(1,16)}=8.517$<br>$p=0.011$ |
| 4B | $F_{(7,16)}=82.23$<br>$p<0.001$ | $F_{(1,16)}=137.10$<br>$p<0.001$ | $F_{(1,16)}=103.90$<br>$p<0.001$ | $F_{(1,16)}=57.04$<br>$p<0.001$ | $F_{(1,16)}=31.23$<br>$p<0.001$ | $F_{(1,16)}=202.20$<br>$p<0.001$ | $F_{(1,16)}=18.57$<br>$p<0.001$ | $F_{(1,16)}=25.49$<br>$p<0.001$ |
| 4C | $F_{(7,16)}=8.96$<br>$p<0.001$  | $F_{(1,16)}=3.68$<br>$p=0.073$   | $F_{(1,16)}=0.16$<br>$p=0.698$   | $F_{(1,16)}=2.63$<br>$p=0.124$  | $F_{(1,16)}=16.11$<br>$p=0.001$ | $F_{(1,16)}=20.35$<br>$p<0.001$  | $F_{(1,16)}=3.21$<br>$p=0.092$  | $F_{(1,16)}=16.61$<br>$p<0.001$ |
| 4D | $F_{(7,16)}=39.09$<br>$p<0.001$ | $F_{(1,16)}=55.49$<br>$p<0.001$  | $F_{(1,16)}=65.81$<br>$p<0.001$  | $F_{(1,16)}=36.02$<br>$p<0.001$ | $F_{(1,16)}=30.34$<br>$p<0.001$ | $F_{(1,16)}=74.41$<br>$p<0.001$  | $F_{(1,16)}=10.39$<br>$p=0.005$ | $F_{(1,16)}=1.18$<br>$p=0.293$  |

---

#### Figure 5

|    |                                 |                                 |                                 |                                 |                                |                                  |                                 |                                 |
|----|---------------------------------|---------------------------------|---------------------------------|---------------------------------|--------------------------------|----------------------------------|---------------------------------|---------------------------------|
| 5A | $F_{(7,16)}=83.60$<br>$p<0.001$ | $F_{(1,16)}=83.24$<br>$p<0.001$ | $F_{(1,16)}=88.02$<br>$p<0.001$ | $F_{(1,16)}=19.13$<br>$p<0.001$ | $F_{(1,16)}=5.08$<br>$p=0.039$ | $F_{(1,16)}=282.10$<br>$p<0.001$ | $F_{(1,16)}=41.09$<br>$p<0.001$ | $F_{(1,16)}=66.53$<br>$p<0.001$ |
| 5B | $F_{(7,16)}=38.48$<br>$p<0.001$ | $F_{(1,16)}=40.21$<br>$p<0.001$ | $F_{(1,16)}=40.18$<br>$p<0.001$ | $F_{(1,16)}=13.94$<br>$p=0.002$ | $F_{(1,16)}=7.25$<br>$p=0.016$ | $F_{(1,16)}=127.60$<br>$p<0.001$ | $F_{(1,16)}=22.82$<br>$p<0.001$ | $F_{(1,16)}=17.33$<br>$p<0.001$ |

---
